# Supplementary material
Source: PubMed Central journal article supplement (PMC2287365)
Supplement: plntphys_pp.107.112789_3.pdf [file plntphys_pp.107.112789_3.pdf]

```

NtWRKY12      MFGSSTFQETINISHQTINPNFAFSPLINMNQDHCNMYQDFDTSFIDQLINDSEEYSNS 60
AtWRKY51      -----MNIS-QNPSPNFTY-----FSDENFINPFMD-NNDFS NLMFFDIDEGGN- 42
AtWRKY50      -----MNDADTNLGSSFSDD-----THSVFEPPELDLSDEWMDDDLVSAVSGMNQ 45
AtWRKY59      -----MNYP-SNPNP-----SSTDFTEFFKFDDFDDTFEKIMEEIGREDH 39
                :* . . . . . . . . . : . . :

NtWRKY12      NNSFN TSLYSQNPFMQQEISTSTYSGSCSSASSFDATPTNIHMNENSSKGIEKEKKAEKH 120
AtWRKY51      NGLIEEEISSPTSIVSSETFTGESGGSGSATTLSKKESTNRGSKESD-----QTKETGH 96
AtWRKY50      SYGYQTSDVAG-ALFSGSSSCF SHPESPSTKTYVAATATASADNQNK-----KEKKKIKG 99
AtWRKY59      SSSPTLSWSSSEKLVAAEITSPLQ TSLATSPMSFEIGDKDEIKKRKR-----HKEDPI 92
                . . . : : . . . : : . . : : *

NtWRKY12      AIAFR TKT---ELEILDDGYKWRKYGKKVKVSN TNPRNYYKCSSGCCKVKKKVERDGNDS 177
AtWRKY51      RVAFR TRS---KIDVMDDGFKWRKYGKKS VKNNINKRNYYKCSSEGCSVKKRVERDGDDA 153
AtWRKY50      RVAFK TRS---EVEVLDDGFKWRKYGKKMVKNS PHPRNYYKCSVDGCPVKKRVERDRDDP 156
AtWRKY59      IHVFK TKSSIDEKVALDDGYKWRKYGKKPITGSPFPRHYHKCSSPDCNVKKKIERDTNNP 152
                .*:*: : : :*:***** :... *:*:*** * ***:*** :..

NtWRKY12      SYLITTYEGKHNHESPFIIYCQEKSTVSFHNDQWSLQ-LADSLW----- 220
AtWRKY51      AYVITTYEGVHNHESLSNVYYN-EMVLSYDHDNWNQHSL LRS----- 194
AtWRKY50      SFVITTYEGSHNHSSMN----- 173
AtWRKY59      DYILTTYEGRHNHPSVSVVYCSDSDDFDLNSLNNWSFQTANTYSF SHSAPY 202
                :*:***** ** *

```
