# Supplementary material
Source: PubMed Central journal article supplement (PMC2287365)
Supplement: plntphys_pp.107.112789_4.pdf [file plntphys_pp.107.112789_4.pdf]

## SUPPLEMENTAL FIGURE LEGENDS

**Supplementary Figure 1.** Analysis of *NtWRKY12* in the tobacco genome by Southern blot hybridization. Genomic DNA from tobacco with (NN) or without (nn) the TMV resistance gene *N* was digested with restriction enzymes *Bam*HI (Ba), *Bgl*III (Bg) or *Hind*III (H), electrophoresed, blotted and hybridized to the radioactively labeled cDNA insert of *NtWRKY12* clone pACT/IV-80. The positions of the DNA size markers (bp x 10<sup>3</sup>) are indicated to the left.

**Supplementary Figure 2.** Nuclear localization of NtWRKY12. Confocal laser scanning microscopic images of transgenic P12 tobacco leaf cells expressing alfalfa mosaic virus (AMV) replicase genes, infected with an AMV-RNA 3 transcript containing the GFP gene, or the *NtWRKY12* coding region fused to GFP, as indicated.

**Supplementary Figure 3.** ClustalW amino acid alignment of NtWRKY12 and WRKYGKK variants of Arabidopsis (AtWRKY50, AtWRKY51, AtWRKY59). Asterisks indicate residues identical in all sequences. Colons indicate amino acids with conserved substitutions. Dots indicate amino acids with semi-conserved substitutions.
