# Supplementary material
Source: PubMed Central journal article supplement (PMC2287365)

**NN**                      **nn**  
**Ba Bg H**                      **Ba Bg H**

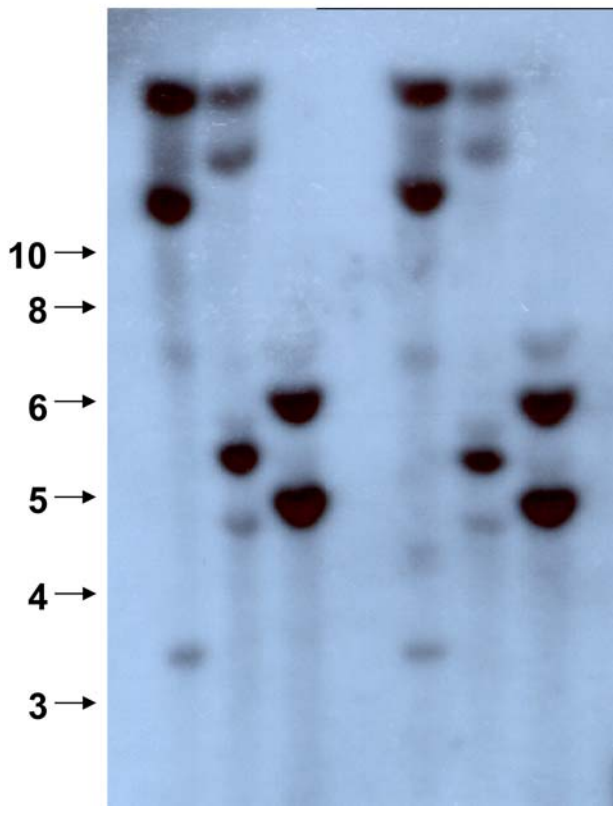

Supplement: plntphys_pp.107.112789_1.pdf [file plntphys_pp.107.112789_1.pdf]

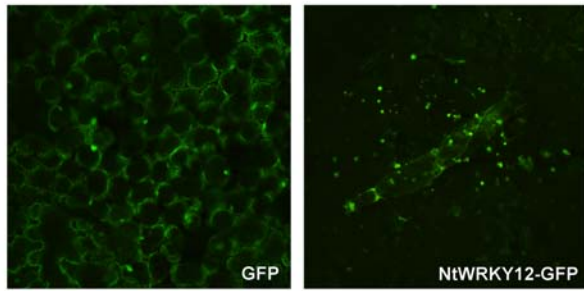

Supplement: plntphys_pp.107.112789_2.pdf [file plntphys_pp.107.112789_2.pdf]
